# Supplementary material
Source: MDPI journal article supplement (https://www.mdpi.com/2311-7524/7/9/273)
Supplement: s1 [file s1]

# Supplementary Materials: Unraveling the Modulation of Controlled Salinity Stress on Morphometric Traits, Mineral Profile, and Bioactive Metabolome Equilibrium in Hydroponic Basil

Giandomenico Corrado, Paola Vitaglione, Pasquale Chiaiese and Youssef Rouphael

**Table S1:** LC/MS/MS characteristics of phenolic compounds identified and quantified in the basil extracts.

| Compound                  | [M-H] <sup>-</sup><br>m/z | Fragments [M-H] <sup>-</sup><br>m/z |
|---------------------------|---------------------------|-------------------------------------|
| Caffeic acid              | 179                       | 135                                 |
| Caffeil-tartaricacid      | 311                       | 179                                 |
| Chicoric acid             | 472                       | 309; 291; 179                       |
| p-Coumaric acid           | 163                       | 119; 113                            |
| Ferulic acid              | 193                       | 134; 178; 149                       |
| Quercetin-rutinoside acid | 609                       | 301                                 |
| Rosmarinic acid           | 359                       | 197; 179; 161                       |

**Table S2:** One-way ANOVA table of the morphometric traits. The unit of measurement of each variable is reported in brackets.

| Variable                               |                | Sum of squares | df | F      | Sign. |
|----------------------------------------|----------------|----------------|----|--------|-------|
| <b>Plant Height</b><br>(cm)            | Between groups | 13.451         | 2  | 6.896  | 0.028 |
|                                        | Within groups  | 5.852          | 6  |        |       |
|                                        | Total          | 19.302         | 8  |        |       |
| <b>Leaf Number</b><br>(no.)            | Between groups | 8.025          | 2  | 0.985  | 0.427 |
|                                        | Within groups  | 24.444         | 6  |        |       |
|                                        | Total          | 32.469         | 8  |        |       |
| <b>Leaf Area</b><br>(cm <sup>2</sup> ) | Between groups | 46854.007      | 2  | 21.677 | 0.002 |
|                                        | Within groups  | 6484.502       | 6  |        |       |
|                                        | Total          | 53338.509      | 8  |        |       |
| <b>Fresh Yield</b><br>(g)              | Between groups | 53.756         | 2  | 14.333 | 0.005 |
|                                        | Within groups  | 11.251         | 6  |        |       |
|                                        | Total          | 65.007         | 8  |        |       |
| <b>Shoot biomass</b><br>(g)            | Between groups | 4.086          | 2  | 15.151 | 0.005 |
|                                        | Within groups  | 0.809          | 6  |        |       |
|                                        | Total          | 4.895          | 8  |        |       |
| <b>Shoot Dry Weight</b><br>(g)         | Between groups | 0.318          | 2  | 9.098  | 0.015 |
|                                        | Within groups  | 0.105          | 6  |        |       |
|                                        | Total          | 0.423          | 8  |        |       |
| <b>Root to Shoot Ratio</b>             | Between groups | 0.006          | 2  | 13.298 | 0.006 |
|                                        | Within groups  | 0.001          | 6  |        |       |
|                                        | Total          | 0.007          | 8  |        |       |
| <b>Leaf Dry Matter</b><br>(%)          | Between groups | 0.579          | 2  | 22.060 | 0.002 |
|                                        | Within groups  | 0.079          | 6  |        |       |
|                                        | Total          | 0.658          | 8  |        |       |

|                            |                |       |   |       |       |
|----------------------------|----------------|-------|---|-------|-------|
| <b>Leaf Dry Weight (g)</b> | Between groups | 0.193 | 2 | 7.857 | 0.021 |
|                            | Within groups  | 0.074 | 6 |       |       |
|                            | Total          | 0.267 | 8 |       |       |
| <b>Root Dry Weight (g)</b> | Between groups | 0.001 | 2 | 2.811 | 0.138 |
|                            | Within groups  | 0.002 | 6 |       |       |
|                            | Total          | 0.003 | 8 |       |       |
| <b>Stem Dry Weight (g)</b> | Between groups | 0.020 | 2 | 3.514 | 0.098 |
|                            | Within groups  | 0.017 | 6 |       |       |
|                            | Total          | 0.037 | 8 |       |       |

**Table S3:** One-way ANOVA table of the SPAD index and color parameters.

| Variable    |                | Sum of squares | df | F      | Sign. |
|-------------|----------------|----------------|----|--------|-------|
| <b>SPAD</b> | Between groups | 0.650          | 2  | 0.253  | 0.785 |
|             | Within groups  | 7.715          | 6  |        |       |
|             | Total          | 8.365          | 8  |        |       |
| <b>L*</b>   | Between groups | 7.010          | 2  | 19.507 | 0.002 |
|             | Within groups  | 1.078          | 6  |        |       |
|             | Total          | 8.088          | 8  |        |       |
| <b>a*</b>   | Between groups | 0.894          | 2  | 27.742 | 0.001 |
|             | Within groups  | 0.097          | 6  |        |       |
|             | Total          | 0.991          | 8  |        |       |
| <b>b*</b>   | Between groups | 3.047          | 2  | 4.690  | 0.059 |
|             | Within groups  | 1.949          | 6  |        |       |
|             | Total          | 4.996          | 8  |        |       |

**Table S4:** One-way ANOVA table of the mineral content in basil leaves. The unit of measurement of each variable is reported in brackets.

| Variable                                         |                | Sum of squares | df | F       | Sign. |
|--------------------------------------------------|----------------|----------------|----|---------|-------|
| <b>Nitrate</b><br><b>(mg kg<sup>-1</sup> fw)</b> | Between groups | 1982790.666    | 2  | 15.655  | 0.004 |
|                                                  | Within groups  | 379977.013     | 6  |         |       |
|                                                  | Total          | 2362767.679    | 8  |         |       |
| <b>P</b><br><b>(mg g<sup>-1</sup> dw)</b>        | Between groups | 105.625        | 2  | 6.448   | 0.032 |
|                                                  | Within groups  | 49.146         | 6  |         |       |
|                                                  | Total          | 154.771        | 8  |         |       |
| <b>K</b><br><b>(mg g<sup>-1</sup> dw)</b>        | Between groups | 414.326        | 2  | 8.451   | 0.018 |
|                                                  | Within groups  | 147.088        | 6  |         |       |
|                                                  | Total          | 561.414        | 8  |         |       |
| <b>Ca</b><br><b>(mg g<sup>-1</sup> dw)</b>       | Between groups | 49.967         | 2  | 16.698  | 0.004 |
|                                                  | Within groups  | 8.977          | 6  |         |       |
|                                                  | Total          | 58.945         | 8  |         |       |
| <b>Mg</b><br><b>(mg g<sup>-1</sup> dw)</b>       | Between groups | 4.683          | 2  | 7.968   | 0.020 |
|                                                  | Within groups  | 1.763          | 6  |         |       |
|                                                  | Total          | 6.446          | 8  |         |       |
| <b>Na</b><br><b>(mg g<sup>-1</sup> dw)</b>       | Between groups | 248.201        | 2  | 102.444 | 0.000 |
|                                                  | Within groups  | 7.268          | 6  |         |       |
|                                                  | Total          | 255.470        | 8  |         |       |

**Table S5:** One-way ANOVA table of the antioxidant activity and polyphenols. The unit of measurement of each variable is reported in brackets.

| Variable                                                        |                | Sum of squares | df | F      | Sign. |
|-----------------------------------------------------------------|----------------|----------------|----|--------|-------|
| <b>HAA</b><br>(mmol asc. ac. eq. kg <sup>-1</sup> dw)           | Between groups | 728.315        | 2  | 61.949 | 0.000 |
|                                                                 | Within groups  | 35.270         | 6  |        |       |
|                                                                 | Total          | 763.585        | 8  |        |       |
| <b>Total polyphenols</b><br>(mg 100 g <sup>-1</sup> dw)         | Between groups | 330723.258     | 2  | 22.024 | 0.002 |
|                                                                 | Within groups  | 45049.543      | 6  |        |       |
|                                                                 | Total          | 375772.801     | 8  |        |       |
| <b>Caffeoyltartaric acid</b><br>(mg 100 g <sup>-1</sup> dw)     | Between groups | 1.607          | 2  | 1.067  | 0.401 |
|                                                                 | Within groups  | 4.518          | 6  |        |       |
|                                                                 | Total          | 6.125          | 8  |        |       |
| <b>Caffeic acid</b><br>(mg 100 g <sup>-1</sup> dw)              | Between groups | 29.859         | 2  | 3.448  | 0.101 |
|                                                                 | Within groups  | 25.981         | 6  |        |       |
|                                                                 | Total          | 55.840         | 8  |        |       |
| <b>p-Coumaric acid</b><br>(mg 100 g <sup>-1</sup> dw)           | Between groups | 38.345         | 2  | 37.982 | 0.000 |
|                                                                 | Within groups  | 3.029          | 6  |        |       |
|                                                                 | Total          | 41.374         | 8  |        |       |
| <b>Ferulic acid</b><br>(mg 100 g <sup>-1</sup> dw)              | Between groups | 58406.084      | 2  | 30.270 | 0.001 |
|                                                                 | Within groups  | 5788.571       | 6  |        |       |
|                                                                 | Total          | 64194.656      | 8  |        |       |
| <b>Chicoric acid</b><br>(mg 100 g <sup>-1</sup> dw)             | Between groups | 7836.817       | 2  | 10.235 | 0.012 |
|                                                                 | Within groups  | 2297.123       | 6  |        |       |
|                                                                 | Total          | 10133.939      | 8  |        |       |
| <b>Quercetin Rutinoside acid</b><br>(mg 100 g <sup>-1</sup> dw) | Between groups | 6104.151       | 2  | 40.247 | 0.000 |
|                                                                 | Within groups  | 455.000        | 6  |        |       |
|                                                                 | Total          | 6559.151       | 8  |        |       |
| <b>Rosmarinic acid</b><br>(mg 100 g <sup>-1</sup> dw)           | Between groups | 122622.023     | 2  | 11.116 | 0.010 |
|                                                                 | Within groups  | 33093.531      | 6  |        |       |
|                                                                 | Total          | 155715.554     | 8  |        |       |
